# Supplementary material for: Interaction between the BAG1S isoform and HSP70 mediates the stability of anti-apoptotic proteins and the survival of osteosarcoma cells expressing oncogenic MYC
Source: Springer Nature journal article supplement (doi:10.1186/s12885-019-5454-2), 2019-03-22
Supplement: MOESM1 [file 16571060]

**Figure S1. MYC-ER simulates oncogenic MYC activity in U2OS cancer cells**

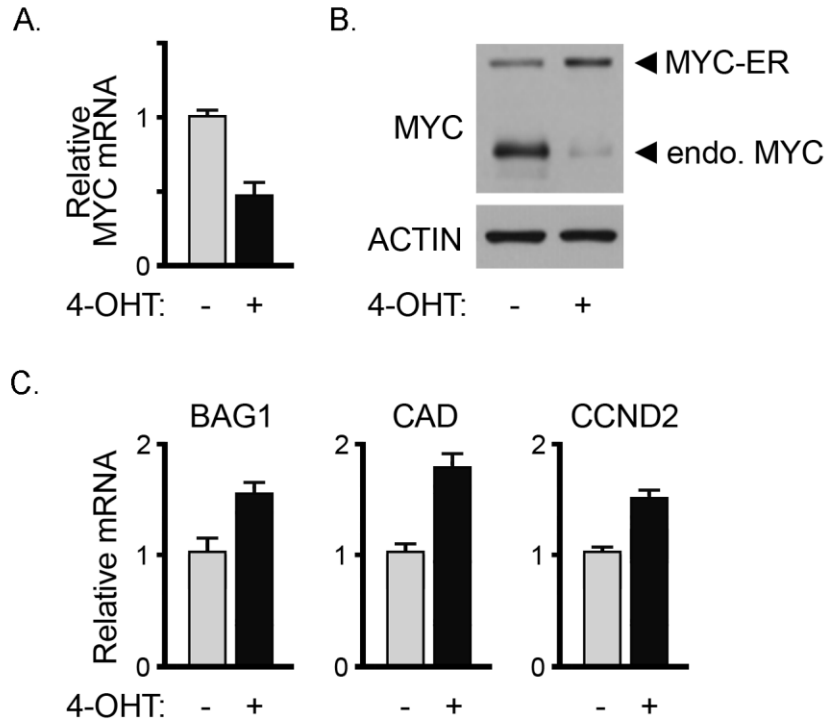

**Figure S1. MYC-ER simulates oncogenic MYC activity in U2OS cancer cells**

U2OS cells engineered to express MYC-ER were treated with 100nM 4-OHT for 48h to induce MYC activity. (A) MYC mRNA was quantified using RT-PCR and demonstrated a reduction in endogenous MYC transcription upon MYC-ER activation. (B) Western blot depicted loss of endogenous MYC protein and increase in MYC-ER fusion protein after 4-OHT treatment. (C) RT-PCR assessment of known MYC target genes BAG1, CAD, and CCND2 revealed induction of transcription after MYC-ER activation.
