# Supplementary material for: Interaction between the BAG1S isoform and HSP70 mediates the stability of anti-apoptotic proteins and the survival of osteosarcoma cells expressing oncogenic MYC
Source: Springer Nature journal article supplement (doi:10.1186/s12885-019-5454-2), 2019-03-22
Supplement: MOESM2 [file 16571060]

**Figure S2. Verification of HSP70 interaction with BAG1S and not BAG1ΔS**

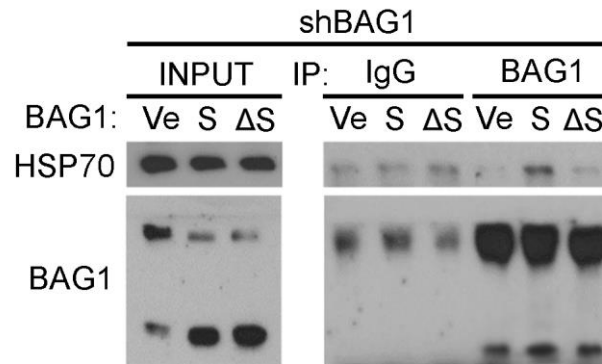

**Figure S2. Verification of HSP70 interaction with BAG1S and not BAG1ΔS**

U2OS MYC-ER cell lysates subjected to a BAG1 IP under non-denatured conditions using A/G beads. Precipitates probed for HSP70 to detect interaction with BAG1S and lapsed interaction with BAG1ΔS. Confirmation of pull-down and sufficient knockdown of endogenous BAG1 was observed by probing for BAG1.
